# Supplementary material for: Aqueous microsolvation of 4-hydroxy-2-butanone: competition between intra- and inter-molecular hydrogen bonds
Source: Royal Society of Chemistry journal article supplement (doi:10.1039/d2cp02404g), 2022-01-01
Supplement: d2cp02404g1.pdf [file d2cp02404g1.pdf]

**Electronic Supplementary Material (ESI) for Physical Chemistry Chemical Physics.**

**This journal is © the Owner Societies 2019**

**Aqueous Microsolvation of 4-hydroxy-2-butanone: Competition  
between intra- and inter-Molecular hydrogen bonds**

Meng Li,<sup>a</sup> Yang Zheng,<sup>a</sup> Jiayi Li,<sup>a</sup> Xuefang Xu,<sup>a</sup> Jens-Uwe Grabow,<sup>b</sup> Qian Gou<sup>\*a</sup>

<sup>a</sup> *School of Chemistry and Chemical Engineering, Chongqing University, Daxuecheng South Rd. 55,  
401331, Chongqing, China.*

<sup>b</sup> *Institut für Physikalische Chemie & Elektrochemie, Gottfried-Wilhelm-Leibniz-Universität, Hannover,  
Callinstr. 3A, 30167 Hannover, Germany.*

*\* Corresponding Author, email: qian.gou@cqu.edu.cn*

1. [Figure Fig.1](#) The NCI and QTAIM analyses for conformer I of 4H2B.
2. [Tables S1-S6](#) The measured transition frequencies  $\nu$  of the six isotopologues of the 4H2B monomer with quantum numbers and difference to calculated frequencies  $\Delta\nu$  in the fit
3. [Table S7](#) The SE rotational constants of the six isotopologues of the 4H2B monomer.
4. [Table S8](#) The  $r_s$ ,  $r^{SE}$ ,  $r_e$  coordinates of the six isotopologues of the 4H2B monomer
5. [Table S9](#) The  $r_s$ ,  $r^{SE}$  and  $r_e$  structural parameters of conformer I of the 4H2B monomer
6. [Table S10](#) Geometries of conformer I of the 4H2B monomer calculated at B3LYP-(GD3BJ)/6-311++G(d,p).
7. [Tables S11-S15](#) The measured transition frequencies  $\nu$  of the five isotopologues of the 4H2B-H<sub>2</sub>O complex with quantum numbers and difference to calculated frequencies  $\Delta\nu$  in the fit.
8. [Table S16](#) Geometries of isomer I of the 4H2B-H<sub>2</sub>O complex calculated at B3LYP-(GD3BJ)/6-311++G(d,p).

1. The NCI analysis for conformer I of 4H2B. (Fig. 1)

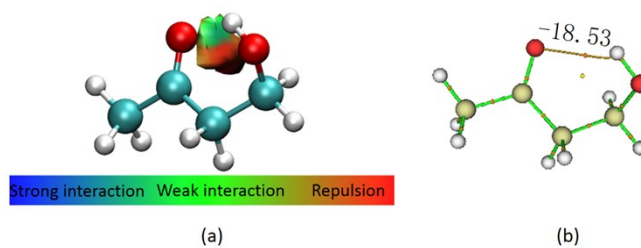

**Fig. 1** (a)The NCI plots for conformer I of 4H2B. Blue and green color signify the strong and weak attractive interaction respectively, while red color indicates repulsive interaction. (b)QTAIM analysis ( $\text{kJ mol}^{-1}$ ). Orange dots show the BCPs and brown lines show the bond paths.

**2. The measured transition frequencies  $\nu$  of the six isotopologues of the 4H2B monomer with quantum numbers and difference to calculated frequencies  $\Delta\nu$  in the fit. (Tables S1-S6)**

**Table S1** The measured transition frequencies  $\nu$  of the 4H2B monomer with quantum numbers and difference to calculated frequencies  $\Delta\nu$  in the fit.

| $J''(ka' kc')-J'''(ka'' kc'')$   | state | $\nu$ /MHz | $\Delta\nu$ /kHz |
|----------------------------------|-------|------------|------------------|
| 2 <sub>02</sub> -1 <sub>01</sub> | A     | 8407.8704  | 0.8              |
|                                  | E     | 8407.0600  | 1.6              |
| 2 <sub>12</sub> -1 <sub>11</sub> | A     | 8067.0262  | 0.4              |
|                                  | E     | 8149.2585  | 1.8              |
| 2 <sub>11</sub> -1 <sub>10</sub> | A     | 8786.0263  | 0.1              |
|                                  | E     | 8703.0646  | 2.1              |
| 3 <sub>03</sub> -2 <sub>02</sub> | A     | 12565.4711 | 1.1              |
|                                  | E     | 12564.0487 | 0.1              |
| 3 <sub>13</sub> -2 <sub>12</sub> | A     | 12089.1348 | 0.6              |
|                                  | E     | 12120.0668 | 1.3              |
| 3 <sub>12</sub> -2 <sub>11</sub> | A     | 13167.0277 | 0.1              |
|                                  | E     | 13134.8924 | 0.1              |
| 4 <sub>04</sub> -3 <sub>03</sub> | A     | 16669.3607 | 1.9              |
|                                  | E     | 16667.0637 | 2.1              |
| 4 <sub>14</sub> -3 <sub>13</sub> | A     | 16098.3881 | 2.6              |
|                                  | E     | 16111.2410 | 1.7              |
| 4 <sub>13</sub> -3 <sub>12</sub> | A     | 17532.7520 | 3.7              |
|                                  | E     | 17518.1412 | 2.5              |
| 4 <sub>23</sub> -3 <sub>22</sub> | A     | 16838.4501 | 13.1             |
|                                  | E     | 16916.6241 | 2.8              |
| 4 <sub>22</sub> -3 <sub>21</sub> | A     | 17021.9901 | 1.5              |
|                                  | E     | 16942.8191 | 5.1              |
| 5 <sub>15</sub> -4 <sub>14</sub> | A     | 20091.8333 | 5.4              |
|                                  | E     | 20097.9983 | 4.6              |
| 1 <sub>10</sub> -1 <sub>01</sub> | A     | 5371.7791  | 0.6              |
|                                  | E     | 5499.1779  | 4.6              |
| 1 <sub>11</sub> -0 <sub>00</sub> | A     | 9225.5430  | 5.9              |
|                                  | E     | 9055.6248  | 0.0              |
| 2 <sub>11</sub> -2 <sub>02</sub> | A     | 5749.9390  | 4.4              |
|                                  | E     | 5795.1864  | 0.1              |
| 2 <sub>21</sub> -2 <sub>12</sub> | A     | 16115.0579 | 9.4              |
|                                  | E     | 15579.7518 | 5.9              |
| 2 <sub>20</sub> -2 <sub>11</sub> | A     | 15055.2186 | 1.9              |
|                                  | E     | 15463.0197 | 4.1              |
| 2 <sub>12</sub> -1 <sub>01</sub> | A     | 13079.3045 | 2.0              |
|                                  | E     | 12991.9834 | 0.6              |
| 3 <sub>12</sub> -3 <sub>03</sub> | A     | 6351.4953  | 5.3              |
|                                  | E     | 6366.0311  | 1.0              |
| 3 <sub>22</sub> -3 <sub>13</sub> | A     | 16665.7099 | 10.7             |
|                                  | E     | 16135.2659 | 2.7              |
| 3 <sub>21</sub> -3 <sub>12</sub> | A     | 14602.2321 | 4.7              |
|                                  | E     | 15005.4243 | 0.9              |
| 3 <sub>03</sub> -2 <sub>12</sub> | A     | 7894.0355  | 1.4              |
|                                  | E     | 7979.1246  | 1.5              |
| 3 <sub>13</sub> -2 <sub>02</sub> | A     | 16760.5708 | 1.3              |
|                                  | E     | 16704.9911 | 2.6              |
| 4 <sub>13</sub> -4 <sub>04</sub> | A     | 7214.8882  | 5.1              |
|                                  | E     | 7217.1113  | 3.3              |
| 4 <sub>23</sub> -4 <sub>14</sub> | A     | 17405.7601 | 9.4              |
|                                  | E     | 16940.6549 | 4.3              |
| 4 <sub>22</sub> -4 <sub>13</sub> | A     | 14091.4705 | 2.2              |
|                                  | E     | 14430.1015 | 7.7              |
| 4 <sub>04</sub> -3 <sub>13</sub> | A     | 12474.2612 | 4.2              |
|                                  | E     | 12526.1209 | 0.1              |
| 5 <sub>14</sub> -5 <sub>05</sub> | A     | 8384.2558  | 2.4              |
|                                  | E     | 8381.4725  | 1.8              |
| 5 <sub>24</sub> -5 <sub>15</sub> | A     | 18338.5890 | 22.0             |
|                                  | E     | 17980.6984 | 4.9              |
| 5 <sub>23</sub> -5 <sub>14</sub> | A     | 13598.0718 | 5.8              |
|                                  | E     | 13830.9260 | 7.7              |
| 5 <sub>05</sub> -4 <sub>14</sub> | A     | 17083.1691 | 7.8              |

|                                  |          |            |      |
|----------------------------------|----------|------------|------|
|                                  | <i>E</i> | 17118.6582 | 6.3  |
| 6 <sub>15</sub> -6 <sub>06</sub> | <i>A</i> | 9899.9524  | 21.2 |
|                                  | <i>E</i> | 9895.9727  | 4.5  |
| 6 <sub>24</sub> -6 <sub>15</sub> | <i>A</i> | 13205.6515 | 19.5 |
|                                  | <i>E</i> | 13334.8381 | 12.9 |
| 1 <sub>11</sub> -0 <sub>00</sub> | <i>A</i> | 9585.0509  | 2.3  |
|                                  | <i>E</i> | 9712.0814  | 2.2  |
| 2 <sub>12</sub> -1 <sub>01</sub> | <i>A</i> | 14157.8102 | 4.4  |
|                                  | <i>E</i> | 14202.2444 | 0.5  |
| 3 <sub>22</sub> -3 <sub>12</sub> | <i>A</i> | 14509.3114 | 4.9  |
|                                  | <i>E</i> | 13910.1777 | 5.8  |
| 3 <sub>12</sub> -2 <sub>02</sub> | <i>A</i> | 18916.9670 | 4.8  |
|                                  | <i>E</i> | 18930.0776 | 1.1  |

---

**Table S2** The measured transition frequencies  $\nu$  for  $^{13}\text{C4}$  of the 4H2B monomer with quantum numbers and difference to calculated frequencies  $\Delta\nu$  in the fit.

| $J''(ka' kc')-J''(ka'' kc'')$ | state | $\nu/\text{MHz}$ | $\Delta\nu/\text{kHz}$ |
|-------------------------------|-------|------------------|------------------------|
| $2_{02}-1_{01}$               | A     | 8321.6214        | 0.8                    |
|                               | E     | 8320.8245        | 1.9                    |
| $2_{12}-1_{11}$               | A     | 7986.6812        | 0.6                    |
|                               | E     | 8068.4975        | 1.5                    |
| $2_{11}-1_{10}$               | A     | 8692.7211        | 1.4                    |
|                               | E     | 8610.1886        | 1.3                    |
| $3_{03}-2_{02}$               | A     | 12437.5174       | 0.1                    |
|                               | E     | 12436.1257       | 2.4                    |
| $3_{13}-2_{12}$               | A     | 11968.9633       | 1.3                    |
|                               | E     | 11999.9177       | 0.2                    |
| $3_{12}-2_{11}$               | A     | 13027.4437       | 1.4                    |
|                               | E     | 12995.3124       | 8.9                    |
| $4_{04}-3_{03}$               | A     | 16501.3027       | 0.2                    |
|                               | E     | 16499.0634       | 5.1                    |
| $4_{14}-3_{13}$               | A     | 15938.7700       | 4.9                    |
|                               | E     | 15951.6586       | 3.1                    |
| $4_{13}-3_{12}$               | A     | 17347.3789       | 1.0                    |
|                               | E     | 17332.7702       | 9.4                    |
| $1_{10}-1_{01}$               | A     | 5342.5426        | 10.3                   |
| $1_{11}-0_{00}$               | A     | 9159.3790        | 0.8                    |
|                               | E     | 8990.1027        | 4.2                    |
| $2_{12}-1_{01}$               | A     | 12976.2038       | 4.3                    |
|                               | E     | 12889.1053       | 4.6                    |
| $3_{03}-2_{12}$               | A     | 7782.9350        | 2.4                    |
|                               | E     | 7867.8449        | 5.1                    |
| $3_{13}-2_{02}$               | A     | 16623.5457       | 3.3                    |
|                               | E     | 16568.1985       | 6.3                    |
| $4_{13}-4_{04}$               | A     | 7149.6450        | 4.8                    |
| $4_{22}-4_{13}$               | A     | 14036.2767       | 3.5                    |
| $4_{04}-3_{13}$               | A     | 12315.2744       | 0.6                    |
|                               | E     | 12366.9906       | 6.2                    |
| $5_{05}-4_{14}$               | A     | 16877.4680       | 2.3                    |
|                               | E     | 16912.8763       | 11.5                   |

**Table S3** The measured transition frequencies  $\nu$  for  $^{13}\text{C3}$  of the 4H2B monomer with quantum numbers and difference to calculated frequencies  $\Delta\nu$  in the fit.

| $J''(ka' kc')-J''(ka'' kc'')$    | state | $\nu/\text{MHz}$ | $\Delta\nu/\text{kHz}$ |
|----------------------------------|-------|------------------|------------------------|
| 2 <sub>02</sub> -1 <sub>01</sub> | A     | 8391.3815        | 2.6                    |
|                                  | E     | 8390.5573        | 0.2                    |
| 2 <sub>12</sub> -1 <sub>11</sub> | A     | 8044.2160        | 5.1                    |
|                                  | E     | 8124.5068        | 0.3                    |
| 2 <sub>11</sub> -1 <sub>10</sub> | A     | 8778.2181        | 4.1                    |
|                                  | E     | 8697.1993        | 2.7                    |
| 3 <sub>03</sub> -2 <sub>02</sub> | A     | 12537.8373       | 1.9                    |
|                                  | E     | 12536.3848       | 2.0                    |
| 3 <sub>13</sub> -2 <sub>12</sub> | A     | 12054.2107       | 1.4                    |
|                                  | E     | 12083.8513       | 3.8                    |
| 3 <sub>12</sub> -2 <sub>11</sub> | A     | 13154.5429       | 0.8                    |
|                                  | E     | 13123.6984       | 0.2                    |
| 4 <sub>04</sub> -3 <sub>03</sub> | A     | 16627.3858       | 0.4                    |
|                                  | E     | 16625.0272       | 3.3                    |
| 4 <sub>14</sub> -3 <sub>13</sub> | A     | 16050.5888       | 1.1                    |
|                                  | E     | 16062.8352       | 3.3                    |
| 4 <sub>13</sub> -3 <sub>12</sub> | A     | 17514.5743       | 2.2                    |
|                                  | E     | 17500.5607       | 0.0                    |
| 1 <sub>10</sub> -1 <sub>01</sub> | A     | 5272.0340        | 1.9                    |
| 1 <sub>11</sub> -0 <sub>00</sub> | A     | 9110.6472        | 2.6                    |
|                                  | E     | 8946.1668        | 1.2                    |
| 2 <sub>11</sub> -2 <sub>02</sub> | A     | 5658.8707        | 7.9                    |
| 2 <sub>12</sub> -1 <sub>01</sub> | A     | 12949.2489       | 8.9                    |
|                                  | E     | 12865.4307       | 0.9                    |
| 3 <sub>12</sub> -3 <sub>03</sub> | A     | 6275.5762        | 4.2                    |
|                                  | E     | 6289.1686        | 7.5                    |
| 3 <sub>03</sub> -2 <sub>12</sub> | A     | 7979.9699        | 1.9                    |
|                                  | E     | 8061.5115        | 6.7                    |
| 3 <sub>13</sub> -2 <sub>02</sub> | A     | 16612.0781       | 1.7                    |
|                                  | E     | 16558.7246       | 3.7                    |
| 4 <sub>13</sub> -4 <sub>04</sub> | A     | 7162.7648        | 2.0                    |
| 4 <sub>04</sub> -3 <sub>13</sub> | A     | 12553.1450       | 3.7                    |
|                                  | E     | 12602.6874       | 0.6                    |
| 5 <sub>05</sub> -4 <sub>14</sub> | A     | 17150.0792       | 1.2                    |
|                                  | E     | 17183.7488       | 6.1                    |

**Table S4** The measured transition frequencies  $\nu$  for  $^{13}\text{C}_2$  of the 4H2B monomer with quantum numbers and difference to calculated frequencies  $\Delta\nu$  in the fit.

| $J''(ka' kc')-J''(ka'' kc'')$    | state | $\nu/\text{MHz}$ | $\Delta\nu/\text{kHz}$ |
|----------------------------------|-------|------------------|------------------------|
| 2 <sub>02</sub> -1 <sub>01</sub> | A     | 8378.9924        | 1.0                    |
|                                  | E     | 8378.1874        | 0.6                    |
| 2 <sub>12</sub> -1 <sub>11</sub> | A     | 8040.3373        | 5.0                    |
|                                  | E     | 8122.5398        | 3.4                    |
| 2 <sub>11</sub> -1 <sub>10</sub> | A     | 8754.4001        | 2.4                    |
|                                  | E     | 8671.4724        | 2.7                    |
| 3 <sub>03</sub> -2 <sub>02</sub> | A     | 12522.8411       | 1.5                    |
|                                  | E     | 12521.4330       | 1.9                    |
| 3 <sub>13</sub> -2 <sub>12</sub> | A     | 12049.2680       | 4.8                    |
|                                  | E     | 12080.2782       | 0.5                    |
| 3 <sub>12</sub> -2 <sub>11</sub> | A     | 13119.7702       | 0.2                    |
|                                  | E     | 13087.5677       | 1.6                    |
| 4 <sub>04</sub> -3 <sub>03</sub> | A     | 16613.7464       | 1.0                    |
|                                  | E     | 16611.4775       | 3.5                    |
| 4 <sub>14</sub> -3 <sub>13</sub> | A     | 16045.5249       | 1.6                    |
|                                  | E     | 16058.4223       | 3.3                    |
| 4 <sub>13</sub> -3 <sub>12</sub> | A     | 17470.1050       | 0.1                    |
|                                  | E     | 17455.4636       | 5.3                    |
| 1 <sub>10</sub> -1 <sub>01</sub> | A     | 5377.3125        | 2.3                    |
| 1 <sub>11</sub> -0 <sub>00</sub> | A     | 9218.9712        | 5.8                    |
|                                  | E     | 9048.9378        | 1.1                    |
| 2 <sub>11</sub> -2 <sub>02</sub> | A     | 5752.7201        | 1.2                    |
|                                  | E     | 5798.1863        | 7.0                    |
| 2 <sub>12</sub> -1 <sub>01</sub> | A     | 13060.6183       | 2.3                    |
|                                  | E     | 12973.1521       | 1.3                    |
| 3 <sub>12</sub> -3 <sub>03</sub> | A     | 6349.6492        | 6.7                    |
|                                  | E     | 6364.3210        | 5.5                    |
| 3 <sub>03</sub> -2 <sub>12</sub> | A     | 7841.2152        | 5.4                    |
|                                  | E     | 7926.4683        | 2.0                    |
| 4 <sub>13</sub> -4 <sub>04</sub> | A     | 7206.0079        | 2.6                    |
|                                  | E     | 7208.3071        | 3.4                    |
| 4 <sub>04</sub> -3 <sub>13</sub> | A     | 12405.6937       | 1.9                    |
|                                  | E     | 12457.6676       | 6.7                    |
| 5 <sub>05</sub> -4 <sub>14</sub> | A     | 16999.7221       | 0.4                    |
|                                  | E     | 17035.3310       | 6.2                    |



**Table S5** The measured transition frequencies  $\nu$  for  $^{13}\text{C}1$  the 4H2B monomer with quantum numbers and difference to calculated frequencies  $\Delta\nu$  in the fit.

| $J''(ka' kc')-J''(ka'' kc'')$ | state | $\nu/\text{MHz}$ | $\Delta\nu/\text{kHz}$ |
|-------------------------------|-------|------------------|------------------------|
| $2_{02}-1_{01}$               | A     | 8218.6984        | 2.2                    |
|                               | E     | 8217.9484        | 0.5                    |
| $2_{12}-1_{11}$               | A     | 7891.8667        | 1.4                    |
|                               | E     | 7974.8051        | 3.7                    |
| $2_{11}-1_{10}$               | A     | 8579.4524        | 2.1                    |
|                               | E     | 8495.8332        | 1.5                    |
| $3_{03}-2_{02}$               | A     | 12285.8892       | 2.7                    |
|                               | E     | 12284.5794       | 0.3                    |
| $3_{13}-2_{12}$               | A     | 11827.4146       | 0.0                    |
|                               | E     | 11859.3682       | 0.8                    |
| $3_{12}-2_{11}$               | A     | 12858.2696       | 2.3                    |
|                               | E     | 12825.1981       | 2.5                    |
| $4_{04}-3_{03}$               | A     | 16304.0495       | 0.7                    |
|                               | E     | 16301.9436       | 1.9                    |
| $4_{14}-3_{13}$               | A     | 15751.2189       | 5.5                    |
|                               | E     | 15764.6083       | 6.3                    |
| $4_{13}-3_{12}$               | A     | 17123.2536       | 0.5                    |
|                               | E     | 17108.2283       | 8.3                    |
| $1_{10}-1_{01}$               | A     | 5394.9391        | 6.7                    |
| $1_{11}-0_{00}$               | A     | 9168.9817        | 6.8                    |
|                               | E     | 8996.1106        | 1.7                    |
| $2_{12}-1_{01}$               | A     | 5755.6931        | 1.4                    |
|                               | E     | 12943.0129       | 5.5                    |
| $3_{12}-3_{03}$               | A     | 12853.4202       | 1.3                    |
|                               | E     | 6328.0734        | 5.7                    |
| $3_{03}-2_{12}$               | A     | 6343.9002        | 0.3                    |
|                               | E     | 7561.5747        | 1.0                    |
|                               | E     | 7649.1075        | 3.3                    |
| $4_{04}-3_{13}$               | A     | 12038.2096       | 1.4                    |
|                               | E     | 12091.6828       | 1.4                    |
| $4_{13}-4_{04}$               | A     | 7147.2775        | 3.6                    |
|                               | E     | 7150.1850        | 3.6                    |
| $5_{05}-4_{14}$               | A     | 16548.5261       | 3.5                    |
|                               | E     | 16585.3981       | 0.6                    |

**Table S6** The measured transition frequencies  $\nu$  for  $^{18}\text{O}_6$  of the 4H2B monomer with quantum numbers and difference to calculated frequencies  $\Delta\nu$  in the fit.

| $J''(ka' kc')-J''(ka'' kc'')$    | state | $\nu/\text{MHz}$ | $\Delta\nu/\text{kHz}$ |
|----------------------------------|-------|------------------|------------------------|
| 2 <sub>02</sub> -1 <sub>01</sub> | A     | 8331.9008        | 4.2                    |
|                                  | E     | 8331.0486        | 5.0                    |
| 2 <sub>12</sub> -1 <sub>11</sub> | A     | 7976.5511        | 2.6                    |
|                                  | E     | 8051.2733        | 4.7                    |
| 2 <sub>11</sub> -1 <sub>10</sub> | A     | 8730.8005        | 6.0                    |
|                                  | E     | 8655.3297        | 2.4                    |
| 3 <sub>03</sub> -2 <sub>02</sub> | A     | 12443.8641       | 1.4                    |
|                                  | E     | 12442.3667       | 5.5                    |
| 3 <sub>13</sub> -2 <sub>12</sub> | A     | 11951.5550       | 12.5                   |
|                                  | E     | 11978.0607       | 8.7                    |
| 3 <sub>12</sub> -2 <sub>11</sub> | A     | 13082.1419       | 0.1                    |
|                                  | E     | 13054.3882       | 7.5                    |
| 4 <sub>04</sub> -3 <sub>03</sub> | A     | 16493.7520       | 12.4                   |
|                                  | E     | 16491.3256       | 9.2                    |
| 1 <sub>11</sub> -0 <sub>00</sub> | A     | 8882.1240        | 0.7                    |
|                                  | E     | 8731.5940        | 0.3                    |
| 2 <sub>12</sub> -1 <sub>01</sub> | A     | 12681.8315       | 2.8                    |
|                                  | E     | 12606.4090       | 7.8                    |
| 3 <sub>03</sub> -2 <sub>12</sub> | A     | 8093.9334        | 12.4                   |
|                                  | E     | 8167.0063        | 5.2                    |
| 4 <sub>13</sub> -4 <sub>04</sub> | A     | 7041.3255        | 0.8                    |
| 5 <sub>05</sub> -4 <sub>14</sub> | A     | 12636.1305       | 3.5                    |
|                                  | E     | 12680.2712       | 1.1                    |

### 3. The SE rotational constants of the six isotopologues of the 4H2B monomer. (Table S7)

**Table S7** The SE rotational constants of the six isotopologues of the 4H2B monomer.

| parameter | A/MHz                    | B/MHz        | C/MHz        |
|-----------|--------------------------|--------------|--------------|
| Parent    | 7360.694(3) <sup>a</sup> | 2318.887(7)  | 1942.6359(5) |
| C1        | 7343.606(1)              | 2261.8911(2) | 1902.0689(2) |
| C2        | 7359.329(1)              | 2310.1589(2) | 1936.5533(2) |
| C3        | 7250.679(1)              | 2318.4206(2) | 1934.4113(2) |
| C4        | 7309.146(1)              | 2293.1344(3) | 1923.5726(3) |
| O6        | 7042.384(4)              | 2309.273(1)  | 1914.9297(9) |

<sup>a</sup>Constrain's errors expressed in parentheses in units of the last digit.

#### 4. The $r_s$ , $r^{SE}$ , $r_e$ coordinates of the six isotopologues of the 4H2B monomer. (Table S8)

**Table S8** The  $r_s$ ,  $r^{SE}$  and  $r_e$  coordinates of the five isotopologues of the 4H2B monomer.

| parameter<br>$r$ | $a/\text{\AA}$   |                |        | $b/\text{\AA}$ |                |        | $c/\text{\AA}$ |                   |        |
|------------------|------------------|----------------|--------|----------------|----------------|--------|----------------|-------------------|--------|
|                  | $r_s$            | $r^{SE}$       | $r_e$  | $r_s$          | $r^{SE}$       | $r_e$  | $r_s$          | $r^{SE}$          | $r_e$  |
| C1               | $\pm 2.341(6)^a$ | $\pm 2.340(6)$ | 2.360  | $\pm 0.318(5)$ | $\pm 0.336(4)$ | -0.316 | $\pm 0.254(6)$ | $\pm 0.231(6)$    | -0.191 |
| C2               | $\pm 0.909(2)$   | $\pm 0.956(2)$ | 0.919  | $\pm 0.08(2)$  | $\pm 0.06(3)$  | 0.087  | $\pm 0.09(2)$  | $\pm 0.10(2)$     | 0.026  |
| C3               | $\pm 0.070(2)$   | $\pm 0.233(6)$ | -0.118 | $\pm 1.019(1)$ | $\pm 1.030(1)$ | -1.020 | $\pm 0.05(3)$  | 0.00 <sup>b</sup> | -0.045 |
| C4               | $\pm 1.507(1)$   | $\pm 1.511(1)$ | -1.497 | $\pm 0.532(3)$ | $\pm 0.559(3)$ | -0.567 | $\pm 0.427(4)$ | $\pm 0.426(4)$    | 0.421  |
| O6               | $\pm 0.614(3)$   | $\pm 0.626(2)$ | 0.600  | $\pm 1.233(1)$ | $\pm 1.235(1)$ | 1.247  | $\pm 0.296(5)$ | $\pm 0.260(6)$    | 0.253  |

<sup>a</sup> Constrain's errors expressed in parentheses in units of the last digit. <sup>b</sup> Imaginary values, fixed at zero.

5. The  $r_s$ ,  $r^{SE}$  and  $r_e$  structural parameters of conformer I of the 4H2B monomer. (Table S9)

Table S9 The  $r_s$ ,  $r^{SE}$  and  $r_e$  structural parameters of conformer I of the 4H2B monomer.

|         | $r_s$                | $r^{SE}$ | $r_e^b$ |
|---------|----------------------|----------|---------|
| RC1C2   | 1.51(1)              | 1.524(8) | 1.513   |
| RC2C3   | 1.45(3)              | 1.58(2)  | 1.521   |
| RC3C4   | 1.59(2) <sup>a</sup> | 1.427(6) | 1.529   |
| RC2O6   | 1.25(3)              | 1.22(3)  | 1.216   |
| ∠C1C2C3 | 116(2)               | 119(1)   | 116.8   |
| ∠C2C3C4 | 111(2)               | 114(1)   | 113.5   |
| ∠C1C2O6 | 120(2)               | 120(2)   | 121.6   |
| ∠O6C2C3 | 123(3)               | 120(2)   | 121.6   |

<sup>a</sup> Numbers in parentheses are  $1\sigma$  uncertainties in the last significant digit. <sup>b</sup> B3LYP-(GD3BJ)/6-311++G(d,p) level of theory.

**6. Geometries of conformer I of the 4H2B monomer calculated at B3LYP-(GD3BJ)/6-311++G(d,p). (Table S10)**

**Table S10** Geometries of conformer I of the 4H2B monomer calculated at B3LYP-(GD3BJ)/6-311++G(d,p).

|      | Bond lengths/Å       |        | Valence angles/° |          | Dihedral Angles/° |
|------|----------------------|--------|------------------|----------|-------------------|
| C1C2 | 1.51(1) <sup>a</sup> | C1C2C3 | 116(2)           | C1C2C3C4 | 170.6             |
| C2C3 | 1.45(3) <sup>a</sup> | C2C3C4 | 111(2)           | O6C2C3C4 | -9.4              |
| C3C4 | 1.59(2) <sup>a</sup> | C1C2O6 | 120(2)           | C2C3C4O5 | 64.9              |
| C2O6 | 1.25(3) <sup>a</sup> | C2C3O6 | 123(3)           |          |                   |
| C4O5 | 1.420                | C3C4O5 | 112.5            |          |                   |
| O6H7 | 2.219                | O5H7O6 | 125.8            |          |                   |

<sup>a</sup> Values of partial  $r_0$  structure with errors expressed in parentheses in units of the last digit.

**7. The measured transition frequencies  $\nu$  of the five isotopologues of the 4H2B-H<sub>2</sub>O complex with quantum numbers and difference to calculated frequencies  $\Delta\nu$  in the fit. (Tables S11-S15)**

**Table S11** The measured transition frequencies  $\nu$  of the 4H2B-H<sub>2</sub>O complex with quantum numbers and difference to calculated frequencies  $\Delta\nu$  in the fit.

| $J''(ka' kc')-J''(ka'' kc'')$    | state | $\nu$ /MHz | $\Delta\nu$ /kHz |
|----------------------------------|-------|------------|------------------|
| 2 <sub>02</sub> -1 <sub>01</sub> | A     | 5641.9787  | 2.3              |
|                                  | E     | 5641.8853  | 2.6              |
| 2 <sub>12</sub> -1 <sub>11</sub> | A     | 5273.1612  | 5.9              |
|                                  | E     | 5274.9867  | 2.7              |
| 2 <sub>11</sub> -1 <sub>10</sub> | A     | 6213.8507  | 1.9              |
|                                  | E     | 6212.1946  | 6.0              |
| 3 <sub>03</sub> -2 <sub>02</sub> | A     | 8236.8981  | 1.7              |
|                                  | E     | 8236.5136  | 1.4              |
| 3 <sub>13</sub> -2 <sub>12</sub> | A     | 7851.8627  | 0.9              |
|                                  | E     | 7852.5245  | 2.5              |
| 3 <sub>12</sub> -2 <sub>11</sub> | A     | 9248.7993  | 3.4              |
|                                  | E     | 9248.3801  | 9.8              |
| 3 <sub>22</sub> -2 <sub>21</sub> | A     | 8615.2344  | 1.2              |
|                                  | E     | 8641.1444  | 6.8              |
| 3 <sub>21</sub> -2 <sub>20</sub> | A     | 8993.5592  | 3.3              |
|                                  | E     | 8968.1224  | 3.9              |
| 4 <sub>04</sub> -3 <sub>03</sub> | A     | 10669.7431 | 0.4              |
|                                  | E     | 10668.7579 | 6.1              |
| 4 <sub>14</sub> -3 <sub>13</sub> | A     | 10378.5453 | 2.2              |
|                                  | E     | 10379.3829 | 5.3              |
| 4 <sub>13</sub> -3 <sub>12</sub> | A     | 12178.1161 | 5.5              |
|                                  | E     | 12177.7931 | 1.9              |
| 4 <sub>23</sub> -3 <sub>22</sub> | A     | 11407.0399 | 0.3              |
|                                  | E     | 11413.2385 | 2.8              |
| 4 <sub>22</sub> -3 <sub>21</sub> | A     | 12222.5850 | 0.1              |
|                                  | E     | 12216.9720 | 1.9              |
| 4 <sub>32</sub> -3 <sub>31</sub> | A     | 11654.6253 | 0.3              |
|                                  | E     | 11686.5909 | 1.9              |
| 4 <sub>31</sub> -3 <sub>30</sub> | A     | 11736.3978 | 4.6              |
|                                  | E     | 11705.0175 | 2.4              |
| 5 <sub>05</sub> -4 <sub>04</sub> | A     | 13030.8428 | 0.6              |
|                                  | E     | 13028.3398 | 3.9              |
| 5 <sub>15</sub> -4 <sub>14</sub> | A     | 12858.1690 | 2.8              |
|                                  | E     | 12860.3966 | 7.2              |
| 5 <sub>14</sub> -4 <sub>13</sub> | A     | 14943.6601 | 1.4              |
|                                  | E     | 14943.0882 | 8.4              |
| 5 <sub>24</sub> -4 <sub>23</sub> | A     | 14133.8616 | 4.3              |
|                                  | E     | 14135.6993 | 5.6              |
| 5 <sub>23</sub> -4 <sub>22</sub> | A     | 15448.9023 | 0.5              |
|                                  | E     | 15447.5348 | 0.6              |
| 5 <sub>33</sub> -4 <sub>32</sub> | A     | 14585.9709 | 7.4              |
|                                  | E     | 14625.8236 | 2.5              |
| 5 <sub>32</sub> -4 <sub>31</sub> | A     | 14851.9588 | 7.7              |
|                                  | E     | 14813.0012 | 2.4              |
| 6 <sub>06</sub> -5 <sub>05</sub> | A     | 15390.1228 | 3.7              |
|                                  | E     | 15383.6832 | 4.0              |
| 6 <sub>16</sub> -5 <sub>15</sub> | A     | 15302.9224 | 1.6              |
|                                  | E     | 15309.0982 | 7.5              |
| 6 <sub>15</sub> -5 <sub>14</sub> | A     | 17505.8430 | 3.3              |
|                                  | E     | 17504.7907 | 3.8              |
| 6 <sub>25</sub> -5 <sub>24</sub> | A     | 16787.4848 | 6.7              |
|                                  | E     | 16788.2226 | 7.6              |
| 6 <sub>24</sub> -5 <sub>23</sub> | A     | 18572.7020 | 2.8              |
|                                  | E     | 18572.1687 | 1.0              |
| 7 <sub>07</sub> -6 <sub>06</sub> | A     | 17765.7447 | 5.7              |
|                                  | E     | 17754.5605 | 0.2              |
| 7 <sub>17</sub> -6 <sub>16</sub> | A     | 17725.8361 | 4.2              |
|                                  | E     | 17736.8111 | 3.8              |
| 2 <sub>20</sub> -1 <sub>11</sub> | A     | 10906.8370 | 1.3              |
|                                  | E     | 10940.9496 | 1.8              |
| 3 <sub>13</sub> -2 <sub>02</sub> | A     | 8856.7476  | 0.2              |

|                                  |          |            |     |
|----------------------------------|----------|------------|-----|
|                                  | <i>E</i> | 8855.5663  | 5.5 |
| 3 <sub>22</sub> -2 <sub>11</sub> | <i>A</i> | 12736.3485 | 2.5 |
|                                  | <i>E</i> | 12722.6499 | 3.1 |
| 4 <sub>04</sub> -3 <sub>13</sub> | <i>A</i> | 10049.8936 | 9.6 |
|                                  | <i>E</i> | 10049.7051 | 9.0 |
| 4 <sub>14</sub> -3 <sub>03</sub> | <i>A</i> | 10998.3947 | 8.7 |
|                                  | <i>E</i> | 10998.4356 | 3.4 |
| 5 <sub>05</sub> -4 <sub>14</sub> | <i>A</i> | 12702.1911 | 7.8 |
|                                  | <i>E</i> | 12698.6620 | 8.4 |
| 5 <sub>15</sub> -4 <sub>04</sub> | <i>A</i> | 13186.8206 | 3.8 |
|                                  | <i>E</i> | 13190.0743 | 3.6 |

---



**Table S12** The measured transition frequencies  $\nu$  for the 4H2B-HOD complex with quantum numbers and difference to calculated frequencies  $\Delta\nu$  in the fit.

| $J''(ka' kc')-J''(ka'' kc'')$    | state                            | $\nu/\text{MHz}$ | $\Delta\nu/\text{kHz}$ |
|----------------------------------|----------------------------------|------------------|------------------------|
| 2 <sub>02</sub> -1 <sub>01</sub> | A                                | 5495.2795        | 3.0                    |
|                                  | E                                | 5495.1776        | 2.3                    |
| 2 <sub>11</sub> -1 <sub>10</sub> | A                                | 6055.0623        | 13.1                   |
|                                  | E                                | 6053.4261        | 1.6                    |
| 3 <sub>03</sub> -2 <sub>02</sub> | A                                | 8021.5611        | 4.7                    |
|                                  | E                                | 8021.1692        | 3.5                    |
| 3 <sub>13</sub> -2 <sub>12</sub> | A                                | 7644.8351        | 10.4                   |
|                                  | E                                | 7645.4682        | 0.3                    |
| 3 <sub>12</sub> -2 <sub>11</sub> | A                                | 9012.1039        | 0.9                    |
|                                  | E                                | 9011.6773        | 7.7                    |
| 4 <sub>04</sub> -3 <sub>03</sub> | A                                | 10389.2190       | 6.8                    |
|                                  | E                                | 10388.2314       | 13.7                   |
| 4 <sub>14</sub> -3 <sub>13</sub> | A                                | 10104.3992       | 6.3                    |
|                                  | E                                | 10105.2025       | 8.5                    |
| 4 <sub>13</sub> -3 <sub>12</sub> | A                                | 11865.6893       | 2.7                    |
|                                  | 4 <sub>23</sub> -3 <sub>22</sub> | A                | 11111.0891             |
| E                                |                                  | 11117.1472       | 6.8                    |
| 4 <sub>22</sub> -3 <sub>21</sub> | A                                | 11909.5838       | 5.5                    |
|                                  | E                                | 11904.0508       | 5.6                    |
| 5 <sub>05</sub> -4 <sub>04</sub> | A                                | 12686.7291       | 1.0                    |
|                                  | E                                | 12684.2382       | 4.7                    |
| 5 <sub>15</sub> -4 <sub>14</sub> | A                                | 12517.9001       | 1.4                    |
|                                  | 5 <sub>14</sub> -4 <sub>13</sub> | A                | 14558.8812             |
| E                                |                                  | 14558.3008       | 7.0                    |
| 5 <sub>24</sub> -4 <sub>23</sub> | A                                | 13766.5158       | 4.2                    |
|                                  | E                                | 13768.2928       | 1.4                    |
| 6 <sub>06</sub> -5 <sub>05</sub> | A                                | 14982.5065       | 1.8                    |
|                                  | E                                | 14976.1301       | 3.6                    |

**Table S13** The measured transition frequencies  $\nu$  for the 4H2B-DOH complex with quantum numbers and difference to calculated frequencies  $\Delta\nu$  in the fit.

| $J''(ka' kc')-J''(ka'' kc'')$    | state | $\nu/\text{MHz}$ | $\Delta\nu/\text{kHz}$ |
|----------------------------------|-------|------------------|------------------------|
| 2 <sub>02</sub> -1 <sub>01</sub> | A     | 5593.1598        | 0.7                    |
|                                  | E     | 5593.0566        | 2.8                    |
| 2 <sub>11</sub> -1 <sub>10</sub> | A     | 6167.8097        | 0.8                    |
|                                  | E     | 6166.1189        | 9.4                    |
| 3 <sub>03</sub> -2 <sub>02</sub> | A     | 8160.0874        | 1.2                    |
|                                  | E     | 8159.6797        | 2.9                    |
| 3 <sub>13</sub> -2 <sub>12</sub> | A     | 7779.4718        | 1.1                    |
|                                  | E     | 7780.1448        | 3.0                    |
| 3 <sub>12</sub> -2 <sub>11</sub> | A     | 9178.1120        | 0.5                    |
|                                  | E     | 9177.6741        | 1.0                    |
| 3 <sub>22</sub> -2 <sub>21</sub> | A     | 8545.0443        | 0.8                    |
| 4 <sub>04</sub> -3 <sub>03</sub> | A     | 10565.1007       | 2.7                    |
|                                  | E     | 10564.0603       | 0.8                    |
| 4 <sub>14</sub> -3 <sub>13</sub> | A     | 10280.6701       | 5.3                    |
|                                  | E     | 10281.5438       | 0.4                    |
| 4 <sub>13</sub> -3 <sub>12</sub> | A     | 12080.1258       | 8.9                    |
|                                  | E     | 12079.7782       | 6.5                    |
| 4 <sub>23</sub> -3 <sub>22</sub> | A     | 11311.8308       | 3.9                    |
|                                  | E     | 11318.0146       | 2.0                    |
| 4 <sub>22</sub> -3 <sub>21</sub> | A     | 12138.3399       | 1.9                    |
|                                  | E     | 12138.3399       | 1.9                    |
| 5 <sub>05</sub> -4 <sub>04</sub> | A     | 12901.0165       | 1.0                    |
|                                  | E     | 12898.3477       | 2.7                    |
| 5 <sub>15</sub> -4 <sub>14</sub> | A     | 12734.6120       | 2.6                    |
|                                  | E     | 12736.9872       | 0.6                    |
| 5 <sub>14</sub> -4 <sub>13</sub> | A     | 14814.4994       | 5.5                    |
|                                  | E     | 14813.8888       | 0.1                    |
| 6 <sub>06</sub> -5 <sub>05</sub> | A     | 15236.8464       | 1.8                    |
|                                  | E     | 15230.0114       | 0.6                    |
| 6 <sub>16</sub> -5 <sub>15</sub> | A     | 15153.9068       | 2.2                    |

**Table S14** The measured transition frequencies  $\nu$  for the 4H2B-H<sub>2</sub><sup>18</sup>O complex with quantum numbers and difference to calculated frequencies  $\Delta\nu$  in the fit.

| $J''(ka' kc')-J''(ka'' kc'')$    | state                            | $\nu$ /MHz | $\Delta\nu$ /kHz |
|----------------------------------|----------------------------------|------------|------------------|
| 2 <sub>02</sub> -1 <sub>01</sub> | A                                | 5450.8193  | 5.0              |
|                                  | E                                | 5450.7276  | 7.7              |
| 2 <sub>11</sub> -1 <sub>10</sub> | A                                | 5995.9460  | 4.7              |
|                                  | E                                | 5994.3068  | 3.0              |
| 3 <sub>03</sub> -2 <sub>02</sub> | A                                | 7965.2087  | 4.6              |
|                                  | E                                | 7964.8577  | 5.0              |
| 3 <sub>13</sub> -2 <sub>12</sub> | A                                | 7587.0197  | 9.5              |
|                                  | E                                | 7587.6324  | 2.4              |
| 3 <sub>12</sub> -2 <sub>11</sub> | A                                | 8927.5350  | 2.0              |
|                                  | E                                | 8927.1119  | 1.9              |
| 3 <sub>22</sub> -2 <sub>21</sub> | A                                | 8317.3353  | 1.9              |
| 4 <sub>04</sub> -3 <sub>03</sub> | A                                | 10323.6789 | 10.4             |
|                                  | E                                | 10322.7970 | 3.1              |
| 4 <sub>14</sub> -3 <sub>13</sub> | A                                | 10031.3065 | 10.4             |
|                                  | E                                | 10032.0354 | 7.6              |
| 4 <sub>13</sub> -3 <sub>12</sub> | A                                | 11762.1600 | 5.1              |
|                                  | E                                | 11761.8495 | 6.7              |
| 4 <sub>23</sub> -3 <sub>22</sub> | A                                | 11015.7512 | 1.2              |
|                                  | E                                | 11022.0099 | 2.1              |
| 4 <sub>22</sub> -3 <sub>21</sub> | A                                | 11780.3834 | 4.5              |
|                                  | E                                | 11774.6082 | 2.8              |
| 4 <sub>32</sub> -3 <sub>31</sub> | A                                | 11246.0769 | 2.3              |
|                                  | E                                | 11275.3642 | 1.4              |
| 4 <sub>31</sub> -3 <sub>30</sub> | A                                | 11319.3457 | 0.2              |
|                                  | E                                | 11290.5238 | 9.6              |
| 5 <sub>05</sub> -4 <sub>04</sub> | A                                | 12608.4795 | 8.1              |
|                                  | E                                | 12606.2934 | 0.7              |
| 5 <sub>15</sub> -4 <sub>14</sub> | A                                | 12430.7300 | 8.9              |
|                                  | E                                | 12432.6233 | 10.4             |
| 5 <sub>14</sub> -4 <sub>13</sub> | A                                | 14446.1118 | 5.1              |
|                                  | E                                | 14445.5976 | 11.4             |
| 5 <sub>24</sub> -4 <sub>23</sub> | A                                | 13653.7726 | 4.5              |
|                                  | E                                | 13655.6140 | 6.7              |
| 5 <sub>23</sub> -4 <sub>22</sub> | A                                | 14896.4007 | 4.9              |
|                                  | E                                | 14894.9484 | 1.7              |
| 5 <sub>33</sub> -4 <sub>32</sub> | A                                | 14075.9155 | 3.9              |
|                                  | E                                | 14114.8988 | 4.0              |
| 5 <sub>32</sub> -4 <sub>31</sub> | A                                | 14315.5145 | 1.1              |
|                                  | E                                | 14277.2539 | 0.4              |
| 6 <sub>06</sub> -5 <sub>05</sub> | A                                | 14888.2415 | 3.2              |
|                                  | E                                | 14882.6269 | 1.7              |
| 6 <sub>16</sub> -5 <sub>15</sub> | A                                | 14796.2605 | 2.2              |
|                                  | 6 <sub>15</sub> -5 <sub>14</sub> | A          | 16939.4738       |
| E                                |                                  | 16938.5428 | 4.9              |
| 6 <sub>25</sub> -5 <sub>24</sub> | A                                | 16223.2990 | 9.6              |
|                                  | E                                | 16224.0136 | 15.2             |
| 7 <sub>07</sub> -6 <sub>06</sub> | A                                | 17183.1561 | 9.7              |
|                                  | E                                | 17172.7402 | 6.7              |
| 4 <sub>04</sub> -3 <sub>13</sub> | A                                | 9686.1650  | 2.1              |
|                                  | E                                | 9686.0554  | 5.6              |

**Table S15** The measured transition frequencies  $\nu$  for the 4H2B-D<sub>2</sub>O complex with quantum numbers and difference to calculated frequencies  $\Delta\nu$  in the fit.

| $J''(ka' kc')-J''(ka'' kc'')$    | state | $\nu/\text{MHz}$ | $\Delta\nu/\text{kHz}$ |
|----------------------------------|-------|------------------|------------------------|
| 2 <sub>02</sub> -1 <sub>01</sub> | A     | 5450.1649        | 1.7                    |
|                                  | E     | 5450.0561        | 5.7                    |
| 3 <sub>03</sub> -2 <sub>02</sub> | A     | 7951.2776        | 5.7                    |
|                                  | E     | 7950.8683        | 2.8                    |
| 3 <sub>13</sub> -2 <sub>12</sub> | A     | 7578.4895        | 9.6                    |
|                                  | E     | 7579.1332        | 1.7                    |
| 3 <sub>12</sub> -2 <sub>11</sub> | A     | 8945.6065        | 8.4                    |
|                                  | E     | 8945.1678        | 14.5                   |
| 4 <sub>04</sub> -3 <sub>03</sub> | A     | 10294.0636       | 5.1                    |
|                                  | E     | 10293.0315       | 16.7                   |
| 4 <sub>14</sub> -3 <sub>13</sub> | A     | 10014.9561       | 3.8                    |
|                                  | E     | 10015.7925       | 9.1                    |
| 4 <sub>13</sub> -3 <sub>12</sub> | A     | 11774.2131       | 10.2                   |
|                                  | E     | 11773.8618       | 9.3                    |
| 4 <sub>23</sub> -3 <sub>22</sub> | A     | 11022.6591       | 3.2                    |
|                                  | E     | 11028.7002       | 1.8                    |
| 5 <sub>05</sub> -4 <sub>04</sub> | A     | 12568.8878       | 6.1                    |
|                                  | E     | 12566.2584       | 6.8                    |
| 5 <sub>15</sub> -4 <sub>14</sub> | A     | 12405.2513       | 1.6                    |
| 5 <sub>14</sub> -4 <sub>13</sub> | A     | 14439.5214       | 0.5                    |
|                                  | E     | 14438.9140       | 4.9                    |
| 5 <sub>24</sub> -4 <sub>23</sub> | A     | 13654.1978       | 14.0                   |
|                                  | E     | 13655.9651       | 2.1                    |
| 6 <sub>06</sub> -5 <sub>05</sub> | A     | 14843.3657       | 6.5                    |
|                                  | E     | 14836.6563       | 3.1                    |
| 6 <sub>16</sub> -5 <sub>15</sub> | A     | 14761.6375       | 0.8                    |
|                                  | E     | 14768.0173       | 2.0                    |

**8. Geometries of isomer I of the 4H2B-H<sub>2</sub>O complex calculated at B3LYP-GD3(BJ)/6-311++G(d,p). (Table S16)**

**Table S16** Geometries of isomer I of the 4H2B-H<sub>2</sub>O complex calculated at B3LYP-GD3(BJ)/6-311++G(d,p).

| Bond lengths/Å |                       | Valence angles/° |       | Dihedral Angles/° |         |
|----------------|-----------------------|------------------|-------|-------------------|---------|
| C1C2           | 1.511                 | C1C2C3           | 116.3 | C1C2C3C4          | -163.4  |
| C2C3           | 1.517                 | C2C3C4           | 115.4 | C2C3C4O5          | 69.7    |
| C3C4           | 1.524                 | C3C4O5           | 111.0 | C4O5O15O6         | 54.8(7) |
| C2O6           | 1.218                 | O5O15O6          | 70.6  | O6C2C3C4          | 17.1    |
| C4O5           | 1.419                 | O5H7O6           | 94.0  |                   |         |
| O5O15          | 2.827(4) <sup>a</sup> |                  |       |                   |         |
| O6O15          | 3.02(2) <sup>a</sup>  |                  |       |                   |         |
| O6H7           | 3.019                 |                  |       |                   |         |

<sup>a</sup> Values of partial  $r_0$  structure with errors expressed in parentheses in units of the last digit.
